# Supplementary material for: Linear Interaction Energy Based Prediction of Cytochrome P450 1A2 Binding Affinities with Reliability Estimation
Source: PubMed Central journal article supplement (PMC4638363; doi:10.1371/journal.pone.0142232), 2015-11-09
Supplement: pone.0142232.s001.pdf [file pone.0142232.s001.pdf]

**S1 Supporting Information.** Per-residue decomposition of the average electrostatic interaction energies  $\langle V^{Ele} \rangle$  (**Figure A**). Per-residue decomposition of the average Van der Waals interaction energies  $\langle V^{vdW} \rangle$  (**Figure B**). Structures and  $IC_{50}$  values from literature for the data set of compounds (**Table A**). Reacting chemical groups in (quasi-)irreversible CYP inhibitors (**Table B**). Overview of the average electrostatic  $\langle V^{Ele} \rangle$  and van der Waals  $\langle V^{vdW} \rangle$  interaction energies (**Table C**).

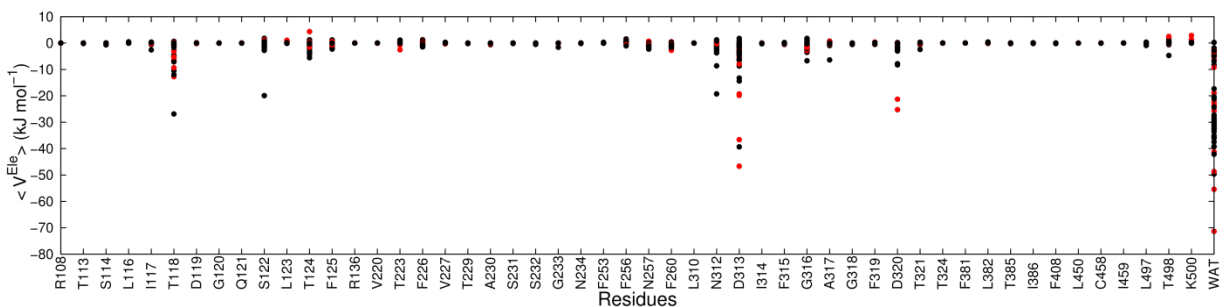

**Figure A. Per-residue decomposition of the average electrostatic interaction energy  $\langle V^{Ele} \rangle$ .** Interaction energies are reported between CYP 1A2 active site residues and training (black) and test set (red) compounds during the multiple MD simulations of the CYP 1A2-ligand complex performed per compound.

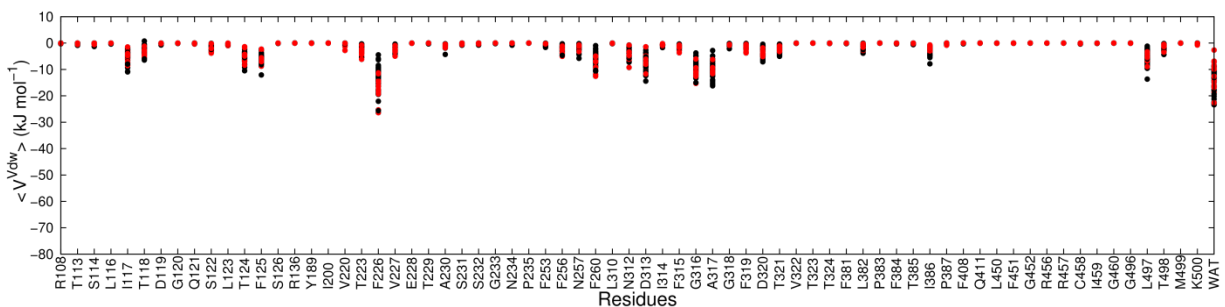

**Figure B. Per-residue decomposition of the average van der Waals interaction energy  $\langle V^{vdW} \rangle$ .** Interaction energies are reported between CYP 1A2 active site residues and training (black) and test set (red) compounds during the multiple MD simulations of the CYP 1A2-ligand complex performed per compound.

**Table A. Structures and  $IC_{50}$  values from literature for the data set of compounds.**

Compounds are classified into LIE model training (Train) and test (Test) set. Inhibitors that are predicted to not be competitive are also reported (NC).

| ID | Structure                                                                           | Molecule              | $IC_{50}$<br>( $\mu\text{M}$ ) | Source | Classification |
|----|-------------------------------------------------------------------------------------|-----------------------|--------------------------------|--------|----------------|
| 1  | 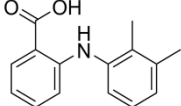   | Mefenamic Acid        | 13.98                          | 1      | Train          |
| 2  |    | Tacrine               | 5.20                           | 1      | Train          |
| 3  |    | Carvedilol            | 5.10                           | 1      | NC             |
| 4  |    | Nifedipine            | 5.74                           | 1      | Train          |
| 5  |   | Ellipticine           | 0.11                           | 2      | NC             |
| 6  |  | Phenacetin            | 28.00                          | 2      | Train          |
| 7  |  | alpha-Naphthoflavone  | 0.08                           | 2      | Train          |
| 8  |  | Ticlopidine           | 22.43                          | 2      | NC             |
| 9  |  | 1-naphthol            | 3.2                            | 3      | Test           |
| 10 |  | 2-naphthol            | 17                             | 3      | Test           |
| 11 |  | p-methoxybenzaldehyde | 270                            | 3      | Test           |

|    |                                                                                     |                    |       |   |       |
|----|-------------------------------------------------------------------------------------|--------------------|-------|---|-------|
| 12 | 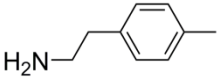   | p-tolyethylaniline | 14    | 3 | Test  |
| 13 |    | HET-0016           | 1.09  | 1 | Train |
| 14 |    | Quercetin          | 5.52  | 1 | Test  |
| 15 |    | Tranlycypromine    | 10.42 | 1 | NC    |
| 16 |    | Niflumic Acid      | 11.59 | 1 | Train |
| 17 |    | Naringenin         | 12.35 | 1 | Test  |
| 18 |   | Paroxetine         | 23.46 | 1 | NC    |
| 19 |  | Clopidogrel        | 24.15 | 1 | NC    |
| 20 |  | 2-Fluoroestradiol  | 26.75 | 1 | Test  |
| 21 |  | Danazol            | 45.32 | 1 | NC    |
| 22 |  | Clotrimazole       | 5.83  | 1 | NC    |
| 23 |  | Mexiletine         | 1.84  | 2 | Train |

|    |                                                                                     |                         |      |   |       |
|----|-------------------------------------------------------------------------------------|-------------------------|------|---|-------|
| 24 | 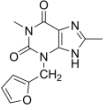   | Furafylline             | 1.50 | 2 | NC    |
| 25 |    | Propranolol             | 3.84 | 2 | Train |
| 26 |    | Riluzole                | 15.8 | 2 | NC    |
| 27 |    | Naphthalene             | 700  | 3 | Train |
| 28 |    | 1-Methylnaphthalene     | 110  | 3 | Train |
| 29 |    | 1-Chloronaphthalene     | 50   | 3 | Test  |
| 30 |   | 2-Methylnaphthalene     | 120  | 3 | Train |
| 31 |  | 2-Ethyl-naphthalene     | 19   | 3 | Test  |
| 32 |  | 2-Fluoronaphthalene     | 49   | 3 | Train |
| 33 |  | 2-Methoxynaphthalene    | 13   | 3 | Test  |
| 34 |  | 1,2-Dimethylnaphthalene | 5.5  | 3 | Test  |
| 35 |  | 1,3-Dimethylnaphthalene | 7.9  | 3 | Train |
| 36 |  | 1,4-Dimethylnaphthalene | 3.6  | 3 | Train |

|    |                                                                                     |                         |     |   |       |
|----|-------------------------------------------------------------------------------------|-------------------------|-----|---|-------|
| 37 | 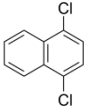   | 1,4-Dichloronaphthalene | 2.3 | 3 | Test  |
| 38 |    | 1,5-Dichloronaphthalene | 14  | 3 | Train |
| 39 |    | 1,5-Dimethylnaphthalene | 42  | 3 | Test  |
| 40 |    | 1,6-Dimethylnaphthalene | 25  | 3 | Test  |
| 41 |    | 1,7-Dimethylnaphthalene | 7.5 | 3 | Test  |
| 42 |    | 2,6-Dimethylnaphthalene | 52  | 3 | Train |
| 43 |  | 2,7-Dimethylnaphthalene | 65  | 3 | Test  |
| 44 |  | Quinaldine              | 40  | 3 | NC    |
| 45 |  | 3-Methylquinoline       | 13  | 3 | NC    |
| 46 |  | 2,4-Dimethylquinoline   | 2.4 | 3 | NC    |
| 47 |  | 2,6-Dimethylquinoline   | 3.3 | 3 | NC    |
| 48 |  | 2,7-Dimethylquinoline   | 4.4 | 3 | NC    |

|    |                                                                                     |                       |        |   |       |
|----|-------------------------------------------------------------------------------------|-----------------------|--------|---|-------|
| 49 | 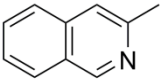   | 3-Methylisoquinoline  | 21     | 3 | NC    |
| 50 |    | ε-Caprolactone        | 40,000 | 3 | Train |
| 51 |    | γ-Valerolactone       | 15,000 | 3 | Train |
| 52 |    | γ-Caprolactone        | 9,900  | 3 | Train |
| 53 |    | γ-Heptalactone        | 4,500  | 3 | Train |
| 54 |    | γ-Nonanoiclactone     | 310    | 3 | Train |
| 55 |    | γ-Decanolactone       | 230    | 3 | Train |
| 56 |   | γ-Undecanoiclactone   | 72     | 3 | Train |
| 57 |  | γ-Dodecanolactone     | 58     | 3 | Test  |
| 58 |  | δ-Decanolactone       | 230    | 3 | Train |
| 59 |  | δ-Undecanolactone     | 72     | 3 | Test  |
| 60 |  | 2-Coumarone           | 260    | 3 | Train |
| 61 |  | 2-Indanone            | 80     | 3 | Train |
| 62 |  | 2,3-Dihydrobenzofuran | 1,200  | 3 | Train |

|    |                                                                                     |                                           |        |   |       |
|----|-------------------------------------------------------------------------------------|-------------------------------------------|--------|---|-------|
| 63 | 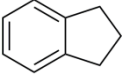   | Indan                                     | 550    | 3 | Test  |
| 64 |    | 2-Benzoxazolinone                         | 370    | 3 | Train |
| 65 |    | Biphenyl                                  | 160    | 3 | Train |
| 66 |    | 2-Chlorobiphenyl                          | 230    | 3 | Test  |
| 67 |    | 4-Chlorobiphenyl                          | 49     | 3 | Train |
| 68 |    | Butylcyclohexane                          | 55     | 3 | Train |
| 69 |    | Butylbenzene                              | 3,700  | 3 | Test  |
| 70 |  | $\gamma$ -Phenyl- $\gamma$ -butyrolactone | 2,300  | 3 | Train |
| 71 |  | 4-Methoxyfuran-2-(5H)-one                 | 40,000 | 3 | Test  |
| 72 |  | 4,6-Dimethyl- $\alpha$ -pyrone            | 4,500  | 3 | Train |
| 73 |  | Cotinine                                  | 5,400  | 3 | Train |

Source 1: Bayer HealthCare databases for CYP inhibition, made available within *eTOX* consortium. Source 2: Cohen, L.; Remley, M.; Raunig, D.; Vaz, A. In *Vitro Drug Interactions of Cytochrome P450: An Evaluation of Fluorogenic to Conventional Substrates*. Drug Metab. Dispos. 2003, 31, 1005–1015. Source 3: Korhonen, L. E.; Rahnasto, M.; Mähönen, N. J.; Wittekindt, C.; Poso, A.; Juvonen, R. O.; Raunio, H. Predictive Three-dimensional Quantitative Structure-activity Relationship of Cytochrome P450 1A2 Inhibitors. J. Med. Chem. 2005, 48, 3808–3815.



**Table B. Reacting chemical groups in (quasi-)irreversible CYP inhibitors.**

| <b>Chemical Group</b>                 | <b>Mechanism of inhibition*</b> |
|---------------------------------------|---------------------------------|
| Aromatic Nitrogens                    | Quasi-irreversible inhibition   |
| Isothiocyanates                       | Mechanism-based inhibition      |
| Thioureas                             | Mechanism-based inhibition      |
| Thiophenes                            | Mechanism-based inhibition      |
| Thiols                                | Mechanism-based inhibition      |
| Thiocyanate                           | Mechanism-based inhibition      |
| Chlorinated groups                    | Mechanism-based inhibition      |
| Alkenes/Alkynes                       | Mechanism-based inhibition      |
| Tertiary amines in heterocyclic rings | Mechanism-based inhibition      |
| Furanocumarines                       | Mechanism-based inhibition      |
| Furanopyridins                        | Mechanism-based inhibition      |
| Methylene dioxycompounds              | Mechanism-based inhibition      |
| Amines                                | Mechanism-based inhibition      |
| Hydrazines                            | Mechanism-based inhibition      |
| Dihydropyridines                      | Mechanism-based inhibition      |
| Dyhydroquinolines                     | Mechanism-based inhibition      |
| Aldehydes                             | Mechanism-based inhibition      |

\*From: Correia, M. A., Ortiz de Montellano P. R. Inhibition of Cytochrome P450 Enzymes. In Cytochrome P450: Structure, Mechanism, and Biochemistry; 3e; Ortiz de Montellano, P. R., Ed; Kluwer Academic / Plenum Publishers, New York, 2005.

**Table C. Overview of average electrostatic  $\langle V^{Ele} \rangle$ , and van der Waals  $\langle V^{vdW} \rangle$  interaction energies.** The energies and their standard deviations are obtained from MD for each ligand, simulated in solvent and in all the orientations obtained from docking and clustering. Relative weights  $W_i$  of the energy for each simulation contributing to the LIE model (maximum 6 poses,  $\alpha=0.587, \beta=0.267$ ) are also reported.

| ID | Solvent                   |                           | Pose | Protein-bound             |                           | $W_i$ |
|----|---------------------------|---------------------------|------|---------------------------|---------------------------|-------|
|    | $\langle V^{Ele} \rangle$ | $\langle V^{vdW} \rangle$ |      | $\langle V^{Ele} \rangle$ | $\langle V^{vdW} \rangle$ |       |
| 1  | $-110.1 \pm 21.4$         | $-77.9 \pm 11.2$          | 1    | $-71.6 \pm 11.5$          | $-152.6 \pm 10.0$         | 0.32  |
|    |                           |                           | 2    | $-53.6 \pm 17.8$          | $-139.0 \pm 11.7$         | 0.00  |
|    |                           |                           | 3    | $-91.9 \pm 18.3$          | $-137.7 \pm 11.2$         | 0.09  |
|    |                           |                           | 4    | $-50.1 \pm 11.1$          | $-146.6 \pm 9.6$          | 0.01  |
|    |                           |                           | 5    | $-80.8 \pm 10.8$          | $-150.9 \pm 9.7$          | 0.58  |
| 2  | $-73.8 \pm 18.1$          | $-72.0 \pm 10.2$          | 1    | $-46.1 \pm 14.8$          | $-134.0 \pm 9.8$          | 0.15  |
|    |                           |                           | 2    | $-48.5 \pm 14.6$          | $-130.8 \pm 9.4$          | 0.09  |
|    |                           |                           | 3    | $-39.5 \pm 14.0$          | $-137.1 \pm 9.2$          | 0.16  |
|    |                           |                           | 4    | $-48.2 \pm 12.6$          | $-133.1 \pm 8.8$          | 0.15  |
|    |                           |                           | 5    | $-42.0 \pm 11.7$          | $-139.0 \pm 9.1$          | 0.32  |
|    |                           |                           | 6    | $-36.0 \pm 12.6$          | $-137.6 \pm 9.3$          | 0.12  |
| 4  | $-129.4 \pm 20.2$         | $-101.1 \pm 12.8$         | 1    | $-83.5 \pm 13.5$          | $-169.5 \pm 12.2$         | 0.13  |
|    |                           |                           | 2    | $-81.9 \pm 18.9$          | $-170.4 \pm 11.5$         | 0.13  |
|    |                           |                           | 3    | $-73.3 \pm 20.3$          | $-165.0 \pm 13.1$         |       |
|    |                           |                           | 4    | $-61.6 \pm 15.2$          | $-183.5 \pm 11.9$         | 0.33  |
|    |                           |                           | 5    | $-83.9 \pm 19.1$          | $-170.2 \pm 12.2$         | 0.16  |
|    |                           |                           | 6    | $-69.1 \pm 13.5$          | $-167.9 \pm 11.0$         | 0.02  |
|    |                           |                           | 7    | $-68.1 \pm 15.6$          | $-179.1 \pm 12.6$         | 0.24  |
| 6  | $-92.2 \pm 16.7$          | $-65.8 \pm 10.0$          | 1    | $-62.7 \pm 11.2$          | $-117.7 \pm 9.4$          | 0.12  |
|    |                           |                           | 2    | $-70.9 \pm 11.3$          | $-116.4 \pm 9.8$          | 0.22  |
|    |                           |                           | 3    | $-45.5 \pm 11.5$          | $-126.3 \pm 9.2$          | 0.15  |
|    |                           |                           | 4    | $-54.0 \pm 14.2$          | $-118.9 \pm 8.8$          | 0.06  |
|    |                           |                           | 5    | $-58.8 \pm 12.9$          | $-119.6 \pm 9.9$          | 0.13  |
|    |                           |                           | 6    | $-56.2 \pm 13.6$          | $-124.7 \pm 9.5$          | 0.32  |
| 7  | $-63.3 \pm 14.5$          | $-96.8 \pm 9.7$           | 1    | $-21.7 \pm 10.5$          | $-183.2 \pm 8.7$          | 0.22  |
|    |                           |                           | 2    | $-44.6 \pm 11.8$          | $-159.1 \pm 9.7$          | 0.01  |
|    |                           |                           | 3    | $-43.7 \pm 9.1$           | $-167.6 \pm 9.6$          | 0.06  |
|    |                           |                           | 4    | $-32.6 \pm 10.7$          | $-153.0 \pm 9.9$          | 0.00  |
|    |                           |                           | 5    | $-39.6 \pm 9.2$           | $-179.9 \pm 8.7$          | 0.71  |
| 13 | $-101.7 \pm 29.8$         | $-72.7 \pm 11.8$          | 1    | $-30.8 \pm 13.5$          | $-150.5 \pm 9.3$          | 0.01  |

|    |                   |                  |   |                   |                   |      |
|----|-------------------|------------------|---|-------------------|-------------------|------|
|    |                   |                  | 2 | $-59.0 \pm 19.2$  | $-132.2 \pm 12.1$ | 0.00 |
|    |                   |                  | 3 | $-83.4 \pm 18.5$  | $-133.4 \pm 11.4$ | 0.07 |
|    |                   |                  | 4 | $-37.9 \pm 16.9$  | $-145.8 \pm 10.8$ | 0.01 |
|    |                   |                  | 5 | $-31.2 \pm 8.6$   | $-149.3 \pm 8.8$  | 0.01 |
|    |                   |                  | 6 | $-120.6 \pm 19.8$ | $-127.6 \pm 12.7$ | 0.90 |
| 16 | $-116.9 \pm 31.3$ | $-74.7 \pm 13.5$ | 1 | $-77.4 \pm 18.4$  | $-148.7 \pm 11.9$ | 0.17 |
|    |                   |                  | 2 | $-65.3 \pm 21.0$  | $-149.9 \pm 11.4$ | 0.06 |
|    |                   |                  | 3 | $-68.1 \pm 23.6$  | $-151.4 \pm 11.8$ | 0.12 |
|    |                   |                  | 4 | $-77.9 \pm 19.5$  | $-149.5 \pm 11.5$ | 0.22 |
|    |                   |                  | 5 | $-68.8 \pm 15.0$  | $-154.5 \pm 10.3$ | 0.27 |
|    |                   |                  | 6 | $-79.1 \pm 22.0$  | $-147.8 \pm 12.2$ | 0.16 |
| 23 | $-63.8 \pm 14.5$  | $-65.5 \pm 9.3$  | 1 | $-41.7 \pm 11.8$  | $-116.1 \pm 10.1$ | 0.07 |
|    |                   |                  | 2 | $-26.9 \pm 17.0$  | $-124.7 \pm 8.3$  | 0.10 |
|    |                   |                  | 3 | $-24.7 \pm 13.0$  | $-127.4 \pm 8.5$  | 0.16 |
|    |                   |                  | 4 | $-36.7 \pm 10.7$  | $-125.8 \pm 8.0$  | 0.38 |
|    |                   |                  | 5 | $-41.4 \pm 10.4$  | $-122.4 \pm 8.6$  | 0.29 |
| 25 | $-94.2 \pm 22.9$  | $-92.2 \pm 11.8$ | 1 | $-39.3 \pm 11.1$  | $-166.5 \pm 10.1$ | 0.07 |
|    |                   |                  | 2 | $-32.2 \pm 11.0$  | $-176.9 \pm 8.7$  | 0.39 |
|    |                   |                  | 3 | $-47.3 \pm 18.4$  | $-167.7 \pm 9.8$  | 0.23 |
|    |                   |                  | 4 | $-51.7 \pm 12.9$  | $-164.4 \pm 10.0$ | 0.17 |
|    |                   |                  | 5 | $-52.0 \pm 22.5$  | $-163.2 \pm 11.5$ | 0.13 |
| 27 | $-22.7 \pm 8.0$   | $-53.2 \pm 6.2$  | 1 | $-11.3 \pm 3.9$   | $-90.4 \pm 6.1$   | 0.52 |
|    |                   |                  | 2 | $-6.9 \pm 4.4$    | $-88.5 \pm 6.3$   | 0.21 |
|    |                   |                  | 3 | $-3.6 \pm 4.9$    | $-90.2 \pm 6.6$   | 0.22 |
|    |                   |                  | 4 | $-12.9 \pm 7.0$   | $-79.0 \pm 7.1$   | 0.04 |
| 28 | $-21.8 \pm 7.5$   | $-59.4 \pm 6.1$  | 1 | $-8.8 \pm 4.2$    | $-101.2 \pm 6.4$  | 0.17 |
|    |                   |                  | 2 | $-6.3 \pm 3.5$    | $-101.2 \pm 6.1$  | 0.13 |
|    |                   |                  | 3 | $-8.6 \pm 4.0$    | $-103.1 \pm 6.2$  | 0.26 |
|    |                   |                  | 4 | $-8.6 \pm 3.9$    | $-105.5 \pm 6.3$  | 0.45 |
| 30 | $-22.4 \pm 8.0$   | $-59.9 \pm 6.5$  | 1 | $-7.7 \pm 4.2$    | $-100.6 \pm 7.0$  | 0.16 |
|    |                   |                  | 2 | $-11.0 \pm 5.1$   | $-96.3 \pm 6.9$   | 0.08 |
|    |                   |                  | 3 | $-6.8 \pm 4.5$    | $-103.2 \pm 7.0$  | 0.26 |
|    |                   |                  | 4 | $-7.1 \pm 3.5$    | $-104.4 \pm 6.0$  | 0.35 |
|    |                   |                  | 5 | $-6.5 \pm 4.7$    | $-101.1 \pm 6.9$  | 0.15 |
| 32 | $-19.4 \pm 7.4$   | $-55.0 \pm 6.2$  | 1 | $-10.1 \pm 4.9$   | $-95.2 \pm 6.9$   | 0.29 |
|    |                   |                  | 2 | $-10.2 \pm 4.3$   | $-91.4 \pm 6.9$   | 0.12 |
|    |                   |                  | 3 | $-11.5 \pm 5.2$   | $-95.4 \pm 6.7$   | 0.36 |
|    |                   |                  | 4 | $-12.5 \pm 4.9$   | $-93.2 \pm 6.9$   | 0.23 |
| 35 | $-21.6 \pm 7.8$   | $-65.8 \pm 6.7$  | 1 | $-7.0 \pm 3.9$    | $-115.7 \pm 6.0$  | 0.34 |
|    |                   |                  | 2 | $-4.4 \pm 3.3$    | $-111.6 \pm 7.0$  | 0.10 |
|    |                   |                  | 3 | $-14.1 \pm 5.6$   | $-113.8 \pm 6.1$  | 0.48 |
|    |                   |                  | 4 | $-8.9 \pm 5.5$    | $-108.5 \pm 6.4$  | 0.08 |
| 36 | $-21.4 \pm 7.5$   | $-65.4 \pm 6.6$  | 1 | $-7.3 \pm 3.1$    | $-115.6 \pm 6.5$  | 0.29 |
|    |                   |                  | 2 | $-7.4 \pm 4.9$    | $-112.2 \pm 6.8$  | 0.13 |

|    |                  |                 |   |                  |                   |      |
|----|------------------|-----------------|---|------------------|-------------------|------|
|    |                  |                 | 3 | $-7.0 \pm 4.2$   | $-113.2 \pm 6.3$  | 0.16 |
|    |                  |                 | 4 | $-7.7 \pm 3.8$   | $-117.1 \pm 6.5$  | 0.43 |
| 38 | $-12.2 \pm 5.5$  | $-67.0 \pm 6.3$ | 1 | $-9.2 \pm 4.6$   | $-110.8 \pm 6.5$  | 0.13 |
|    |                  |                 | 2 | $-3.9 \pm 3.4$   | $-117.3 \pm 5.8$  | 0.34 |
|    |                  |                 | 3 | $-5.9 \pm 3.7$   | $-111.3 \pm 6.6$  | 0.10 |
|    |                  |                 | 4 | $-10.3 \pm 3.4$  | $-115.4 \pm 6.5$  | 0.43 |
| 42 | $-21.8 \pm 7.7$  | $-66.1 \pm 6.6$ | 1 | $-9.8 \pm 4.6$   | $-113.6 \pm 6.0$  | 0.28 |
|    |                  |                 | 2 | $-9.4 \pm 3.3$   | $-110.5 \pm 7.0$  | 0.13 |
|    |                  |                 | 3 | $-5.0 \pm 3.2$   | $-104.3 \pm 6.1$  | 0.02 |
|    |                  |                 | 4 | $-7.5 \pm 3.7$   | $-113.4 \pm 6.6$  | 0.21 |
|    |                  |                 | 5 | $-5.0 \pm 3.1$   | $-117.0 \pm 6.1$  | 0.37 |
| 50 | $-58.1 \pm 13.4$ | $-45.2 \pm 7.5$ | 1 | $-42.6 \pm 14.5$ | $-80.3 \pm 7.7$   | 0.28 |
|    |                  |                 | 2 | $-41.8 \pm 13.1$ | $-80.6 \pm 7.5$   | 0.27 |
|    |                  |                 | 3 | $-41.3 \pm 10.8$ | $-81.0 \pm 8.2$   | 0.29 |
|    |                  |                 | 4 | $-42.6 \pm 13.0$ | $-77.8 \pm 9.0$   | 0.16 |
| 51 | $-54.4 \pm 13.0$ | $-39.9 \pm 7.4$ | 1 | $-44.4 \pm 13.2$ | $-71.2 \pm 7.8$   | 0.22 |
|    |                  |                 | 2 | $-47.7 \pm 11.7$ | $-72.3 \pm 7.8$   | 0.40 |
|    |                  |                 | 3 | $-37.4 \pm 15.4$ | $-72.7 \pm 8.1$   | 0.15 |
|    |                  |                 | 4 | $-34.8 \pm 8.3$  | $-72.9 \pm 7.4$   | 0.12 |
|    |                  |                 | 5 | $-33.2 \pm 13.2$ | $-73.5 \pm 7.1$   | 0.11 |
| 52 | $-54.7 \pm 13.6$ | $-46.5 \pm 7.4$ | 1 | $-41.9 \pm 13.5$ | $-83.7 \pm 8.5$   | 0.50 |
|    |                  |                 | 2 | $-35.5 \pm 10.0$ | $-84.2 \pm 7.3$   | 0.28 |
|    |                  |                 | 3 | $-37.6 \pm 12.1$ | $-78.3 \pm 7.9$   | 0.09 |
|    |                  |                 | 4 | $-32.4 \pm 15.1$ | $-82.2 \pm 8.2$   | 0.13 |
| 53 | $-54.3 \pm 13.0$ | $-52.8 \pm 8.1$ | 1 | $-36.8 \pm 11.4$ | $-94.2 \pm 8.2$   | 0.19 |
|    |                  |                 | 2 | $-57.7 \pm 14.2$ | $-88.1 \pm 8.1$   | 0.41 |
|    |                  |                 | 3 | $-32.2 \pm 9.6$  | $-95.9 \pm 7.8$   | 0.17 |
|    |                  |                 | 4 | $-23.9 \pm 11.4$ | $-96.2 \pm 8.4$   | 0.07 |
|    |                  |                 | 5 | $-42.5 \pm 11.7$ | $-90.9 \pm 8.7$   | 0.16 |
| 54 | $-54.0 \pm 13.0$ | $-65.9 \pm 8.7$ | 1 | $-41.7 \pm 12.1$ | $-115.9 \pm 8.3$  | 0.25 |
|    |                  |                 | 2 | $-27.7 \pm 14.6$ | $-121.1 \pm 8.0$  | 0.19 |
|    |                  |                 | 3 | $-42.6 \pm 12.3$ | $-112.1 \pm 8.9$  | 0.11 |
|    |                  |                 | 4 | $-45.1 \pm 11.5$ | $-112.5 \pm 11.5$ | 0.16 |
|    |                  |                 | 5 | $-36.3 \pm 10.5$ | $-108.9 \pm 9.8$  | 0.03 |
|    |                  |                 | 6 | $-42.1 \pm 12.2$ | $-116.1 \pm 8.7$  | 0.27 |
|    |                  |                 | 7 | $-36.5 \pm 12.5$ | $-105.3 \pm 8.6$  |      |
| 55 | $-53.3 \pm 12.9$ | $-72.5 \pm 8.5$ | 1 | $-32.7 \pm 12.5$ | $-122.9 \pm 9.1$  | 0.09 |
|    |                  |                 | 2 | $-38.2 \pm 11.6$ | $-123.4 \pm 9.0$  | 0.18 |
|    |                  |                 | 3 | $-35.6 \pm 10.3$ | $-124.9 \pm 8.8$  | 0.20 |
|    |                  |                 | 4 | $-44.1 \pm 10.8$ | $-123.4 \pm 9.6$  | 0.34 |
|    |                  |                 | 5 | $-28.7 \pm 13.4$ | $-124.2 \pm 9.7$  | 0.08 |
|    |                  |                 | 6 | $-27.1 \pm 16.9$ | $-126.4 \pm 8.6$  | 0.11 |
| 56 | $-52.6 \pm 13.0$ | $-79.8 \pm 9.0$ | 1 | $-35.3 \pm 10.9$ | $-131.4 \pm 9.0$  | 0.06 |
|    |                  |                 | 2 | $-33.8 \pm 7.8$  | $-133.8 \pm 8.7$  | 0.08 |

|    |                  |                 |   |                  |                   |      |
|----|------------------|-----------------|---|------------------|-------------------|------|
|    |                  |                 | 3 | $-35.7 \pm 12.2$ | $-136.4 \pm 8.8$  | 0.19 |
|    |                  |                 | 4 | $-39.4 \pm 11.7$ | $-139.6 \pm 9.4$  | 0.60 |
|    |                  |                 | 5 | $-33.1 \pm 10.3$ | $-133.6 \pm 9.3$  | 0.07 |
| 58 | $-57.5 \pm 13.6$ | $-70.5 \pm 8.7$ | 1 | $-48.4 \pm 11.4$ | $-119.7 \pm 8.7$  | 0.25 |
|    |                  |                 | 2 | $-42.7 \pm 14.1$ | $-120.2 \pm 9.4$  | 0.15 |
|    |                  |                 | 3 | $-42.5 \pm 13.7$ | $-105.7 \pm 9.3$  | 0.01 |
|    |                  |                 | 4 | $-38.2 \pm 10.7$ | $-126.1 \pm 8.9$  | 0.38 |
|    |                  |                 | 5 | $-35.5 \pm 11.6$ | $-124.1 \pm 9.1$  | 0.18 |
|    |                  |                 | 6 | $-43.5 \pm 12.5$ | $-114.0 \pm 10.7$ | 0.04 |
| 60 | $-46.5 \pm 12.8$ | $-50.9 \pm 7.7$ | 1 | $-41.1 \pm 10.7$ | $-90.1 \pm 7.6$   | 0.27 |
|    |                  |                 | 2 | $-11.3 \pm 9.7$  | $-95.5 \pm 7.4$   | 0.04 |
|    |                  |                 | 3 | $-33.8 \pm 9.4$  | $-91.5 \pm 7.2$   | 0.17 |
|    |                  |                 | 4 | $-35.4 \pm 9.4$  | $-94.1 \pm 7.0$   | 0.38 |
|    |                  |                 | 5 | $-33.6 \pm 10.9$ | $-90.6 \pm 7.8$   | 0.14 |
| 61 | $-45.7 \pm 12.1$ | $-51.5 \pm 7.4$ | 1 | $-13.6 \pm 14.8$ | $-94.3 \pm 7.0$   | 0.10 |
|    |                  |                 | 2 | $-25.7 \pm 9.0$  | $-92.2 \pm 7.3$   | 0.22 |
|    |                  |                 | 3 | $-30.4 \pm 9.7$  | $-89.7 \pm 7.3$   | 0.20 |
|    |                  |                 | 4 | $-33.2 \pm 8.8$  | $-89.7 \pm 7.5$   | 0.28 |
|    |                  |                 | 5 | $-32.8 \pm 9.9$  | $-88.5 \pm 7.4$   | 0.20 |
| 62 | $-25.3 \pm 8.9$  | $-50.4 \pm 6.4$ | 1 | $-10.2 \pm 7.3$  | $-85.6 \pm 6.3$   | 0.15 |
|    |                  |                 | 2 | $-12.9 \pm 6.6$  | $-87.4 \pm 6.3$   | 0.30 |
|    |                  |                 | 3 | $-13.4 \pm 6.8$  | $-87.7 \pm 6.9$   | 0.34 |
|    |                  |                 | 4 | $-13.0 \pm 6.6$  | $-86.1 \pm 6.4$   | 0.22 |
| 64 | $-64.0 \pm 14.6$ | $-48.0 \pm 8.1$ | 1 | $-61.7 \pm 11.8$ | $-86.2 \pm 8.9$   | 0.21 |
|    |                  |                 | 2 | $-59.3 \pm 12.5$ | $-82.4 \pm 8.3$   | 0.07 |
|    |                  |                 | 3 | $-48.8 \pm 12.8$ | $-88.4 \pm 8.7$   | 0.09 |
|    |                  |                 | 4 | $-67.7 \pm 17.8$ | $-83.7 \pm 9.0$   | 0.22 |
|    |                  |                 | 5 | $-70.1 \pm 14.4$ | $-85.5 \pm 8.7$   | 0.43 |
| 65 | $-27.4 \pm 9.4$  | $-62.5 \pm 7.0$ | 1 | $-10.7 \pm 4.5$  | $-108.7 \pm 6.0$  | 0.16 |
|    |                  |                 | 2 | $-6.9 \pm 4.8$   | $-107.3 \pm 6.4$  | 0.08 |
|    |                  |                 | 3 | $-11.8 \pm 4.8$  | $-109.5 \pm 6.3$  | 0.22 |
|    |                  |                 | 4 | $-12.5 \pm 4.6$  | $-108.1 \pm 6.2$  | 0.17 |
|    |                  |                 | 5 | $-7.9 \pm 5.4$   | $-112.7 \pm 6.8$  | 0.31 |
|    |                  |                 | 6 | $-9.1 \pm 5.5$   | $-105.9 \pm 6.3$  | 0.07 |
| 67 | $-22.9 \pm 8.5$  | $-69.9 \pm 7.0$ | 1 | $-5.4 \pm 4.9$   | $-123.1 \pm 7.7$  | 0.16 |
|    |                  |                 | 2 | $-7.4 \pm 3.8$   | $-122.4 \pm 6.3$  | 0.16 |
|    |                  |                 | 3 | $-10.1 \pm 3.9$  | $-121.2 \pm 6.7$  | 0.17 |
|    |                  |                 | 4 | $-6.1 \pm 5.0$   | $-123.8 \pm 7.5$  | 0.21 |
|    |                  |                 | 5 | $-12.9 \pm 5.5$  | $-119.0 \pm 7.0$  | 0.14 |
|    |                  |                 | 6 | $-10.7 \pm 4.6$  | $-120.2 \pm 6.7$  | 0.15 |
| 68 | $2.7 \pm 1.1$    | $-68.3 \pm 6.2$ | 1 | $0.0 \pm 0.9$    | $-118.3 \pm 7.9$  | 0.52 |
|    |                  |                 | 2 | $0.9 \pm 0.8$    | $-103.9 \pm 8.4$  | 0.02 |
|    |                  |                 | 3 | $0.2 \pm 0.9$    | $-114.7 \pm 7.1$  | 0.22 |
|    |                  |                 | 4 | $0.7 \pm 0.8$    | $-105.8 \pm 7.0$  | 0.03 |

|                           |                   |                  |   |                   |                   |      |
|---------------------------|-------------------|------------------|---|-------------------|-------------------|------|
|                           |                   |                  | 5 | $0.5 \pm 0.8$     | $-112.1 \pm 7.1$  | 0.12 |
|                           |                   |                  | 6 | $0.4 \pm 1.0$     | $-111.3 \pm 9.3$  | 0.10 |
| 70                        | $-68.0 \pm 14.7$  | $-60.2 \pm 8.2$  | 1 | $-35.0 \pm 12.6$  | $-105.8 \pm 8.8$  | 0.05 |
|                           |                   |                  | 2 | $-48.0 \pm 16.3$  | $-106.7 \pm 8.4$  | 0.23 |
|                           |                   |                  | 3 | $-47.3 \pm 13.3$  | $-108.5 \pm 8.8$  | 0.32 |
|                           |                   |                  | 4 | $-46.0 \pm 12.7$  | $-110.0 \pm 7.8$  | 0.40 |
| 72                        | $-52.9 \pm 12.7$  | $-47.4 \pm 7.7$  | 1 | $-45.8 \pm 13.0$  | $-84.2 \pm 8.6$   | 0.27 |
|                           |                   |                  | 2 | $-50.3 \pm 11.8$  | $-83.3 \pm 8.3$   | 0.36 |
|                           |                   |                  | 3 | $-37.3 \pm 12.7$  | $-85.1 \pm 7.7$   | 0.14 |
|                           |                   |                  | 4 | $-39.3 \pm 10.0$  | $-86.4 \pm 7.1$   | 0.23 |
| 73                        | $-95.2 \pm 17.6$  | $-59.2 \pm 10.0$ | 1 | $-63.6 \pm 17.1$  | $-108.1 \pm 10.2$ | 0.11 |
|                           |                   |                  | 2 | $-55.1 \pm 13.2$  | $-118.8 \pm 10.1$ | 0.55 |
|                           |                   |                  | 3 | $-58.1 \pm 16.6$  | $-113.0 \pm 10.5$ | 0.20 |
|                           |                   |                  | 4 | $-48.5 \pm 17.6$  | $-111.2 \pm 9.0$  | 0.05 |
|                           |                   |                  | 5 | $-37.2 \pm 19.1$  | $-115.4 \pm 11.5$ | 0.04 |
|                           |                   |                  | 6 | $-45.8 \pm 22.7$  | $-113.2 \pm 10.6$ | 0.06 |
| <b>Test set compounds</b> |                   |                  |   |                   |                   |      |
| 9                         | $-57.0 \pm 14.6$  | $-50.2 \pm 8.7$  | 1 | $-49.1 \pm 13.4$  | $-92.5 \pm 9.5$   | 0.39 |
|                           |                   |                  | 2 | $-40.1 \pm 10.1$  | $-94.3 \pm 8.0$   | 0.23 |
|                           |                   |                  | 3 | $-51.5 \pm 11.2$  | $-87.4 \pm 8.9$   | 0.15 |
|                           |                   |                  | 4 | $-48.7 \pm 13.3$  | $-90.3 \pm 9.2$   | 0.22 |
| 10                        | $-65.0 \pm 15.4$  | $-48.9 \pm 9.2$  | 1 | $-45.3 \pm 13.2$  | $-92.2 \pm 9.2$   | 0.10 |
|                           |                   |                  | 2 | $-49.9 \pm 13.8$  | $-90.8 \pm 9.0$   | 0.12 |
|                           |                   |                  | 3 | $-54.2 \pm 14.7$  | $-89.2 \pm 9.1$   | 0.13 |
|                           |                   |                  | 4 | $-56.4 \pm 10.1$  | $-94.4 \pm 8.4$   | 0.56 |
|                           |                   |                  | 5 | $-57.9 \pm 13.5$  | $-86.3 \pm 9.7$   | 0.10 |
| 11                        | $-54.7 \pm 13.4$  | $-51.2 \pm 7.8$  | 1 | $-22.5 \pm 8.4$   | $-94.3 \pm 6.5$   | 0.07 |
|                           |                   |                  | 2 | $-40.3 \pm 10.7$  | $-94.2 \pm 7.4$   | 0.44 |
|                           |                   |                  | 3 | $-27.0 \pm 10.1$  | $-92.1 \pm 7.3$   | 0.06 |
|                           |                   |                  | 4 | $-37.2 \pm 13.0$  | $-85.3 \pm 8.8$   | 0.04 |
|                           |                   |                  | 5 | $-47.8 \pm 9.6$   | $-90.4 \pm 7.8$   | 0.39 |
| 12                        | $-59.5 \pm 15.3$  | $-50.9 \pm 9.0$  | 1 | $-34.7 \pm 14.1$  | $-98.6 \pm 8.2$   | 0.13 |
|                           |                   |                  | 2 | $-49.0 \pm 15.9$  | $-87.0 \pm 9.6$   | 0.04 |
|                           |                   |                  | 3 | $-34.3 \pm 13.3$  | $-97.3 \pm 8.7$   | 0.09 |
|                           |                   |                  | 4 | $-19.6 \pm 15.0$  | $-100.3 \pm 8.0$  | 0.04 |
|                           |                   |                  | 5 | $-42.6 \pm 13.1$  | $-94.1 \pm 9.0$   | 0.11 |
|                           |                   |                  | 6 | $-41.7 \pm 10.9$  | $-101.8 \pm 8.9$  | 0.59 |
| 14                        | $-171.0 \pm 34.2$ | $-78.0 \pm 16.3$ | 1 | $-120.1 \pm 24.4$ | $-161.0 \pm 14.5$ | 0.04 |
|                           |                   |                  | 2 | $-125.2 \pm 23.8$ | $-167.5 \pm 13.3$ | 0.31 |
|                           |                   |                  | 3 | $-71.3 \pm 24.3$  | $-172.9 \pm 10.9$ | 0.00 |
|                           |                   |                  | 4 | $-106.6 \pm 32.7$ | $-163.9 \pm 14.3$ | 0.02 |
|                           |                   |                  | 5 | $-146.2 \pm 29.4$ | $-158.9 \pm 15.6$ | 0.39 |
|                           |                   |                  | 6 | $-154.7 \pm 35.2$ | $-152.9 \pm 18.0$ | 0.24 |
| 17                        | $-132.0 \pm 29.2$ | $-77.4 \pm 14.1$ | 1 | $-112.0 \pm 18.2$ | $-152.5 \pm 13.9$ | 0.53 |

|    |                  |                  |   |                   |                   |      |
|----|------------------|------------------|---|-------------------|-------------------|------|
|    |                  |                  | 2 | $-50.7 \pm 18.3$  | $-168.3 \pm 9.6$  | 0.03 |
|    |                  |                  | 3 | $-83.3 \pm 17.1$  | $-155.1 \pm 11.7$ | 0.05 |
|    |                  |                  | 4 | $-100.5 \pm 17.8$ | $-140.5 \pm 12.7$ | 0.01 |
|    |                  |                  | 5 | $-95.2 \pm 17.1$  | $-158.6 \pm 13.4$ | 0.38 |
| 20 | $-92.7 \pm 20.9$ | $-91.0 \pm 11.8$ | 1 | $-64.3 \pm 20.3$  | $-162.8 \pm 12.3$ | 0.19 |
|    |                  |                  | 2 | $-56.8 \pm 27.7$  | $-146.9 \pm 14.5$ | 0.00 |
|    |                  |                  | 3 | $-89.0 \pm 17.6$  | $-151.6 \pm 12.4$ | 0.20 |
|    |                  |                  | 4 | $-54.8 \pm 24.5$  | $-154.7 \pm 17.1$ | 0.01 |
|    |                  |                  | 5 | $-52.3 \pm 16.1$  | $-170.2 \pm 10.7$ | 0.30 |
|    |                  |                  | 6 | $-70.5 \pm 15.8$  | $-161.7 \pm 11.5$ | 0.29 |
| 29 | $-17.1 \pm 6.7$  | $-60.2 \pm 6.2$  | 1 | $-7.7 \pm 3.6$    | $-101.1 \pm 5.8$  | 0.19 |
|    |                  |                  | 2 | $-7.7 \pm 3.8$    | $-105.0 \pm 6.4$  | 0.48 |
|    |                  |                  | 3 | $-6.3 \pm 3.8$    | $-102.7 \pm 6.1$  | 0.23 |
|    |                  |                  | 4 | $-8.1 \pm 4.3$    | $-98.2 \pm 6.5$   | 0.10 |
| 31 | $-21.8 \pm 7.7$  | $-65.8 \pm 6.6$  | 1 | $-6.9 \pm 3.4$    | $-111.5 \pm 6.3$  | 0.06 |
|    |                  |                  | 2 | $-11.1 \pm 3.9$   | $-116.0 \pm 7.1$  | 0.27 |
|    |                  |                  | 3 | $-9.2 \pm 5.3$    | $-112.4 \pm 6.5$  | 0.10 |
|    |                  |                  | 4 | $-8.7 \pm 3.8$    | $-115.6 \pm 6.8$  | 0.19 |
|    |                  |                  | 5 | $-4.5 \pm 3.1$    | $-116.2 \pm 6.2$  | 0.14 |
|    |                  |                  | 6 | $-10.6 \pm 3.8$   | $-115.5 \pm 6.7$  | 0.23 |
| 33 | $-30.0 \pm 9.7$  | $-63.6 \pm 6.9$  | 1 | $-12.3 \pm 4.0$   | $-108.8 \pm 6.1$  | 0.12 |
|    |                  |                  | 2 | $-12.5 \pm 6.8$   | $-109.6 \pm 7.1$  | 0.14 |
|    |                  |                  | 3 | $-14.5 \pm 7.1$   | $-111.1 \pm 7.1$  | 0.26 |
|    |                  |                  | 4 | $-19.0 \pm 6.6$   | $-107.8 \pm 6.6$  | 0.19 |
|    |                  |                  | 5 | $-14.8 \pm 7.1$   | $-109.9 \pm 7.2$  | 0.20 |
|    |                  |                  | 6 | $-13.2 \pm 5.9$   | $-107.5 \pm 6.6$  | 0.10 |
| 34 | $-21.7 \pm 7.8$  | $-65.1 \pm 6.6$  | 1 | $-5.9 \pm 3.7$    | $-111.4 \pm 7.1$  | 0.06 |
|    |                  |                  | 2 | $-7.6 \pm 4.0$    | $-116.9 \pm 6.5$  | 0.27 |
|    |                  |                  | 3 | $-8.1 \pm 3.7$    | $-117.9 \pm 7.4$  | 0.37 |
|    |                  |                  | 4 | $-6.6 \pm 4.4$    | $-117.7 \pm 6.9$  | 0.30 |
| 37 | $-12.8 \pm 6.0$  | $-66.9 \pm 6.2$  | 1 | $-8.4 \pm 3.6$    | $-117.4 \pm 6.9$  | 0.46 |
|    |                  |                  | 2 | $-7.4 \pm 3.7$    | $-115.5 \pm 6.3$  | 0.26 |
|    |                  |                  | 3 | $-4.6 \pm 3.8$    | $-114.4 \pm 6.1$  | 0.15 |
|    |                  |                  | 4 | $-9.7 \pm 4.1$    | $-111.4 \pm 7.0$  | 0.13 |
| 39 | $-21.3 \pm 7.6$  | $-65.5 \pm 6.6$  | 1 | $-10.3 \pm 4.1$   | $-110.6 \pm 7.2$  | 0.17 |
|    |                  |                  | 2 | $-8.4 \pm 4.1$    | $-115.9 \pm 6.8$  | 0.48 |
|    |                  |                  | 3 | $-5.2 \pm 3.7$    | $-114.6 \pm 6.6$  | 0.25 |
|    |                  |                  | 4 | $-5.8 \pm 3.5$    | $-110.5 \pm 6.9$  | 0.10 |
| 40 | $-21.5 \pm 7.6$  | $-65.8 \pm 6.6$  | 1 | $-11.2 \pm 5.7$   | $-106.1 \pm 7.0$  | 0.03 |
|    |                  |                  | 2 | $-6.2 \pm 3.6$    | $-119.9 \pm 7.1$  | 0.49 |
|    |                  |                  | 3 | $-5.0 \pm 4.7$    | $-115.6 \pm 6.9$  | 0.16 |
|    |                  |                  | 4 | $-7.3 \pm 4.1$    | $-116.7 \pm 7.0$  | 0.26 |
|    |                  |                  | 5 | $-4.4 \pm 2.9$    | $-112.0 \pm 6.5$  | 0.06 |
| 41 | $-21.7 \pm 7.4$  | $-65.7 \pm 6.5$  | 1 | $-5.5 \pm 4.3$    | $-110.6 \pm 6.3$  | 0.08 |

|    |                  |                 |   |                  |                  |      |
|----|------------------|-----------------|---|------------------|------------------|------|
|    |                  |                 | 2 | $-8.3 \pm 4.1$   | $-113.5 \pm 7.2$ | 0.21 |
|    |                  |                 | 3 | $-5.7 \pm 4.3$   | $-115.2 \pm 6.7$ | 0.24 |
|    |                  |                 | 4 | $-6.4 \pm 3.9$   | $-117.6 \pm 7.1$ | 0.45 |
|    |                  |                 | 5 | $-4.3 \pm 3.4$   | $-104.6 \pm 6.7$ | 0.02 |
| 43 | $-21.6 \pm 7.6$  | $-66.4 \pm 6.5$ | 1 | $-5.7 \pm 3.6$   | $-113.6 \pm 6.4$ | 0.10 |
|    |                  |                 | 2 | $-7.7 \pm 4.0$   | $-117.3 \pm 7.4$ | 0.30 |
|    |                  |                 | 3 | $-4.6 \pm 3.4$   | $-115.3 \pm 6.1$ | 0.13 |
|    |                  |                 | 4 | $-4.3 \pm 3.7$   | $-110.1 \pm 7.0$ | 0.04 |
|    |                  |                 | 5 | $-6.7 \pm 3.5$   | $-119.2 \pm 6.4$ | 0.42 |
| 57 | $-53.7 \pm 12.9$ | $-85.1 \pm 9.0$ | 1 | $-38.4 \pm 9.4$  | $-148.5 \pm 9.8$ | 0.57 |
|    |                  |                 | 2 | $-29.1 \pm 8.9$  | $-144.9 \pm 9.5$ | 0.09 |
|    |                  |                 | 3 | $-23.5 \pm 13.5$ | $-145.5 \pm 8.4$ | 0.06 |
|    |                  |                 | 4 | $-15.8 \pm 9.9$  | $-148.9 \pm 8.9$ | 0.06 |
|    |                  |                 | 5 | $-37.6 \pm 10.9$ | $-144.9 \pm 9.8$ | 0.22 |
|    |                  |                 | 6 | $-32.9 \pm 9.6$  | $-132.1 \pm 9.9$ | 0.01 |
| 59 | $-56.1 \pm 13.1$ | $-77.5 \pm 8.7$ | 1 | $-45.8 \pm 10.9$ | $-137.7 \pm 9.7$ | 0.56 |
|    |                  |                 | 2 | $-30.2 \pm 10.2$ | $-131.6 \pm 9.3$ | 0.02 |
|    |                  |                 | 3 | $-33.2 \pm 12.0$ | $-128.3 \pm 9.0$ | 0.02 |
|    |                  |                 | 4 | $-43.3 \pm 12.7$ | $-128.5 \pm 9.0$ | 0.05 |
|    |                  |                 | 5 | $-42.0 \pm 11.4$ | $-136.1 \pm 9.4$ | 0.25 |
|    |                  |                 | 6 | $-32.6 \pm 11.9$ | $-136.3 \pm 8.5$ | 0.10 |
| 63 | $-17.6 \pm 7.4$  | $-52.3 \pm 6.0$ | 1 | $-3.1 \pm 5.1$   | $-82.7 \pm 8.1$  | 0.06 |
|    |                  |                 | 2 | $-2.5 \pm 3.8$   | $-90.0 \pm 6.6$  | 0.34 |
|    |                  |                 | 3 | $-3.1 \pm 2.5$   | $-89.2 \pm 6.0$  | 0.29 |
|    |                  |                 | 4 | $-2.7 \pm 3.5$   | $-89.5 \pm 5.9$  | 0.31 |
| 66 | $-20.7 \pm 8.3$  | $-68.2 \pm 7.1$ | 1 | $-3.3 \pm 4.0$   | $-116.8 \pm 7.1$ | 0.10 |
|    |                  |                 | 2 | $-7.4 \pm 4.2$   | $-117.6 \pm 7.2$ | 0.19 |
|    |                  |                 | 3 | $-12.9 \pm 5.0$  | $-116.7 \pm 7.5$ | 0.27 |
|    |                  |                 | 4 | $-6.7 \pm 5.6$   | $-118.6 \pm 6.8$ | 0.22 |
|    |                  |                 | 5 | $-10.8 \pm 4.8$  | $-116.0 \pm 7.6$ | 0.18 |
|    |                  |                 | 6 | $-8.0 \pm 4.8$   | $-110.4 \pm 6.5$ | 0.04 |
| 69 | $-16.1 \pm 7.6$  | $-60.6 \pm 6.5$ | 1 | $-4.9 \pm 6.0$   | $-100.8 \pm 6.8$ | 0.14 |
|    |                  |                 | 2 | $-2.3 \pm 2.1$   | $-102.9 \pm 6.0$ | 0.17 |
|    |                  |                 | 3 | $-4.6 \pm 3.7$   | $-99.8 \pm 6.5$  | 0.11 |
|    |                  |                 | 4 | $-3.9 \pm 3.0$   | $-104.0 \pm 7.5$ | 0.27 |
|    |                  |                 | 5 | $-5.2 \pm 3.7$   | $-103.9 \pm 6.6$ | 0.31 |
| 71 | $-58.0 \pm 13.5$ | $-42.3 \pm 7.7$ | 1 | $-43.4 \pm 11.6$ | $-76.5 \pm 7.7$  | 0.30 |
|    |                  |                 | 2 | $-31.1 \pm 11.6$ | $-79.8 \pm 7.4$  | 0.18 |
|    |                  |                 | 3 | $-26.0 \pm 12.6$ | $-80.0 \pm 8.1$  | 0.11 |
|    |                  |                 | 4 | $-39.4 \pm 12.5$ | $-76.8 \pm 9.0$  | 0.21 |
|    |                  |                 | 5 | $-38.8 \pm 12.5$ | $-77.0 \pm 7.6$  | 0.21 |
